# Supplementary material for: Chemical Composition, Nutritional Value, and Acceptance of Nut Bars with the Addition of Edible Insect Powder
Source: MDPI journal article supplement (doi:10.3390/molecules27238472), 2022-12-02
Supplement: s1 [file s1]

Table S1 Examples of commercially available products containing edible insects (adapted from [www.bugburger.se](http://www.bugburger.se))

|   | Name                         | Picture                                                                             |
|---|------------------------------|-------------------------------------------------------------------------------------|
| 1 | Bar (protein bar energy bar) |    |
| 2 | Beer                         |    |
| 3 | Bread                        |   |
| 4 | Burgers                      |  |
| 5 | Cookies                      |  |
| 6 | Crackers                     |  |
| 7 | Crisps/Chips                 |  |

|    |                       |                                                                                                                                                                                                                                                                                                                                                                                                                                                                                                                          |
|----|-----------------------|--------------------------------------------------------------------------------------------------------------------------------------------------------------------------------------------------------------------------------------------------------------------------------------------------------------------------------------------------------------------------------------------------------------------------------------------------------------------------------------------------------------------------|
| 8  | Noodles               |                                                                                                                                                                                                                                                                      |
| 9  | Oil                   |                                                                                                                                                                                                                                                                                                                                                                                                                                        |
| 10 | Pancake mix           |                                                                                                                                                                                                                                                                   |
| 11 | Pasta                 |       |
| 12 | Protein powder/shakes |                                                                                                                                                                           |

Table S2 Amino acid profile of raw materials and products.

|      | Non-essential amino acids (non-EAA) mg · g <sup>-1</sup> of protein |                           |                            |                           |                             |                            |                           |                           |                            | Total non-EAA              |
|------|---------------------------------------------------------------------|---------------------------|----------------------------|---------------------------|-----------------------------|----------------------------|---------------------------|---------------------------|----------------------------|----------------------------|
|      | Alanine                                                             | Arginine                  | Aspartic acid              | Cysteine                  | Glutamic acid               | Glycine                    | Proline                   | Serine                    | Tyrosine                   |                            |
| BW   | 75.85 <sup>d</sup> ±1.25                                            | 62.03 <sup>a</sup> ±1.70  | 97.81 <sup>cb</sup> ±2.34  | 11.40 <sup>a</sup> ±0.36  | 144.18 <sup>b</sup> ±3.42   | 51.24 <sup>fe</sup> ±1.10  | 74.34 <sup>de</sup> ±1.50 | 47.50 <sup>b</sup> ±1.05  | 90.10 <sup>h</sup> ±2.44   | 654.45 <sup>b</sup> ±14.39 |
| CF   | 99.77 <sup>f</sup> ±1.43                                            | 70.21 <sup>bc</sup> ±0.71 | 94.56 <sup>bc</sup> ±1.23  | 10.71 <sup>a</sup> ±0.60  | 126.30 <sup>a</sup> ±1.69   | 60.26 <sup>b</sup> ±0.70   | 64.27 <sup>b</sup> ±0.88  | 48.43 <sup>b</sup> ±0.77  | 58.62 <sup>f</sup> ±0.74   | 633.15 <sup>b</sup> ±7.56  |
| TM   | 80.32 <sup>e</sup> ±1.51                                            | 60.36 <sup>a</sup> ±1.15  | 91.06 <sup>b</sup> ±1.52   | 10.98 <sup>a</sup> ±0.41  | 130.72 <sup>a</sup> ±2.35   | 56.72 <sup>g</sup> ±1.04   | 79.56 <sup>f</sup> ±1.32  | 49.673 <sup>b</sup> ±0.97 | 74.59 <sup>g</sup> ±1.6    | 633.98 <sup>b</sup> ±11.09 |
| CN   | 32.14 <sup>a</sup> ±0.64                                            | 91.15 <sup>d</sup> ±2.11  | 76.70 <sup>a</sup> ±2.39   | 16.809 <sup>b</sup> ±2.03 | 182.88 <sup>c</sup> ±3.19   | 35.57 <sup>a</sup> ±0.72   | 28.10 <sup>a</sup> ±0.95  | 42.15 <sup>a</sup> ±0.82  | 27.99 <sup>a</sup> ±0.44   | 533.48 <sup>a</sup> ±12.82 |
| HN   | 40.48 <sup>b</sup> ±1.43                                            | 124.77 <sup>e</sup> ±3.29 | 91.97 <sup>bc</sup> ±2.45  | 15.75 <sup>b</sup> ±0.65  | 209.27 <sup>de</sup> ±5.04  | 40.58 <sup>b</sup> ±1.47   | 27.56 <sup>a</sup> ±0.99  | 39.95 <sup>a</sup> ±1.10  | 25.27 <sup>a</sup> ±0.90   | 615.59 <sup>b</sup> ±16.23 |
| ST   | 65.93 <sup>c</sup> ±4.97                                            | 72.59 <sup>cb</sup> ±6.16 | 114.68 <sup>e</sup> ±10.34 | 30.43 <sup>e</sup> ±0.63  | 277.31 <sup>g</sup> ±23.60  | 45.97 <sup>dc</sup> ±4.00  | 80.34 <sup>f</sup> ±7.08  | 93.52 <sup>f</sup> ±8.20  | 41.18 <sup>b</sup> ±2.95   | 821.95 <sup>e</sup> ±66.36 |
| BW15 | 64.95 <sup>c</sup> ±0.26                                            | 66.29 <sup>b</sup> ±0.68  | 106.04 <sup>d</sup> ±0.43  | 25.27 <sup>d</sup> ±0.32  | 222.36 <sup>ef</sup> ±1.64  | 44.02 <sup>c</sup> ±0.67   | 70.20 <sup>cd</sup> ±1.67 | 77.50 <sup>de</sup> ±0.47 | 49.07 <sup>de</sup> ±1.05  | 725.70 <sup>dc</sup> ±6.08 |
| BW30 | 71.72 <sup>d</sup> ±0.49                                            | 69.05 <sup>bc</sup> ±1.19 | 110.60 <sup>d</sup> ±1.03  | 24.54 <sup>d</sup> ±0.04  | 211.03 <sup>def</sup> ±1.60 | 47.90 <sup>de</sup> ±0.52  | 72.043 <sup>c</sup> ±0.64 | 75.71 <sup>d</sup> ±0.69  | 59.19 <sup>f</sup> ±1.99   | 741.79 <sup>d</sup> ±6.85  |
| CF15 | 73.79 <sup>d</sup> ±0.42                                            | 69.56 <sup>bc</sup> ±0.39 | 105.68 <sup>d</sup> ±1.02  | 25.23 <sup>d</sup> ±0.26  | 223.15 <sup>ef</sup> ±0.95  | 47.96 <sup>de</sup> ±0.21  | 72.06 <sup>de</sup> ±0.51 | 78.41 <sup>de</sup> ±0.44 | 46.26 <sup>cd</sup> ±2.03  | 742.10 <sup>d</sup> ±2.07  |
| CF30 | 73.79 <sup>d</sup> ±5.15                                            | 68.31 <sup>bc</sup> ±1.47 | 104.82 <sup>d</sup> ±2.09  | 23.12 <sup>c</sup> ±0.88  | 195.04 <sup>c</sup> ±4.41   | 48.67 <sup>def</sup> ±1.08 | 65.97 <sup>bc</sup> ±1.74 | 72.14 <sup>cd</sup> ±1.24 | 45.84 <sup>c</sup> ±1.85   | 697.70 <sup>c</sup> ±17.44 |
| TM15 | 68.43 <sup>cd</sup> ±3.60                                           | 69.24 <sup>bc</sup> ±3.05 | 106.55 <sup>d</sup> ±5.03  | 24.67 <sup>d</sup> ±0.38  | 230.88 <sup>fe</sup> ±11.18 | 47.89 <sup>de</sup> ±2.44  | 75.73 <sup>ef</sup> ±4.98 | 81.14 <sup>ed</sup> ±4.16 | 50.453 <sup>ed</sup> ±3.07 | 754.98 <sup>d</sup> ±35.82 |
| TM30 | 73.92 <sup>d</sup> ±4.69                                            | 70.28 <sup>bc</sup> ±4.24 | 110.07 <sup>d</sup> ±5.08  | 25.64 <sup>d</sup> ±0.45  | 207.96 <sup>d</sup> ±12.08  | 50.75 <sup>ef</sup> ±3.17  | 74.36 <sup>de</sup> ±5.06 | 78.98 <sup>de</sup> ±4.25 | 56.90 <sup>f</sup> ±3.67   | 748.87 <sup>d</sup> ±42.02 |

HN – hazelnut, CN – cashews nuts, CF - cricket *A. domesticus*, TM - mealworm *T. molitor*, BW - buffalo worm *A. diaperinu*

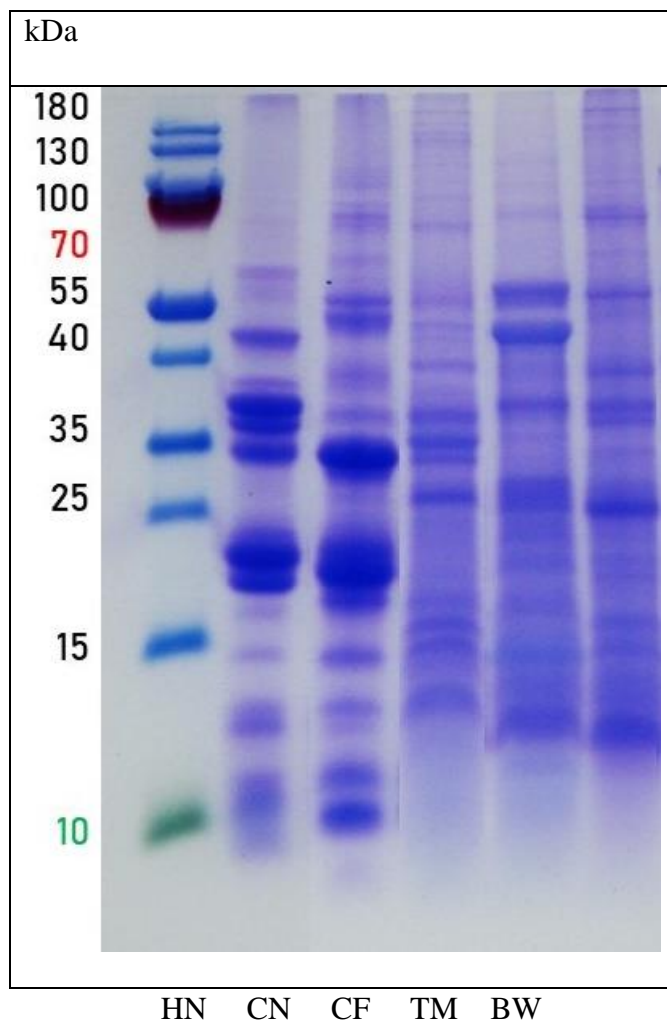

Figure S1 Protein profiles of selected raw materials analyzed by SDS-PAGE

Explanatory notes:

HN – hazelnut, CN – cashews nuts, CF - cricket *A. domesticus*, TM - mealworm *T. molitor*, BW - buffalo worm *A. diaperinus*

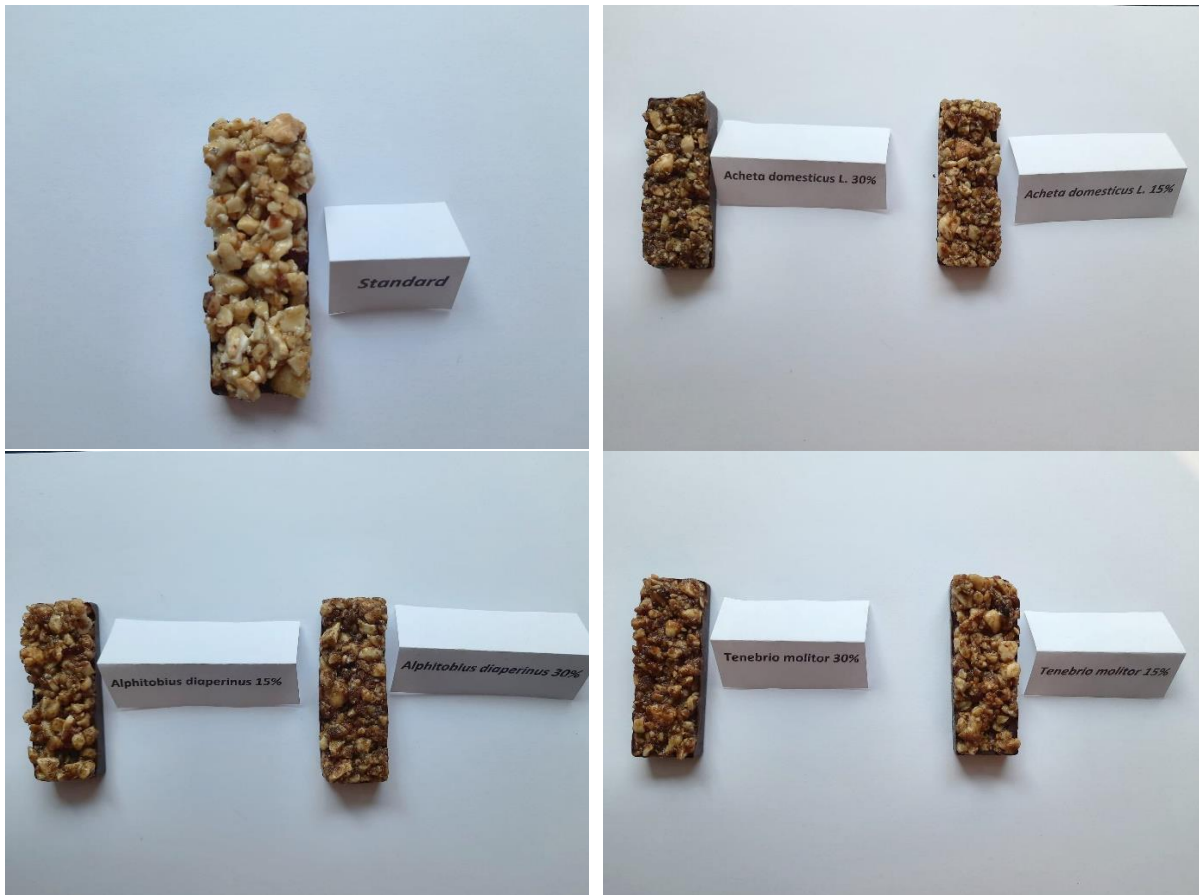

Figure S2 Nut bars with various levels of edible insects flour substitution - overall appearance

Table S3 Concentration of individual volatile compounds in edible insect flours (g/100g).

| Volatile compounds    | BW                       | CF                       | TM                       |
|-----------------------|--------------------------|--------------------------|--------------------------|
| Acetaldehyde          | 4.50 <sup>b</sup> ±0.14* | 4.56 <sup>c</sup> ±0.13  | 0.08 <sup>a</sup> ±0.02  |
| 2-Propanol            | 26.04 <sup>c</sup> ±0.18 | 21.70 <sup>b</sup> ±0.17 | 7.79 <sup>a</sup> ±0.11  |
| 2-Methylpropanal      | 0.01 <sup>a</sup> ±0.01  | 1.83 <sup>c</sup> ±0.05  | 0.05 <sup>b</sup> ±0.02  |
| Butanal               | 0.67 <sup>a</sup> ±0.04  | 2.34 <sup>c</sup> ±0.08  | 1.55 <sup>b</sup> ±0.05  |
| Butan-2-one           | 7.36 <sup>c</sup> ±0.09  | 0.28 <sup>a</sup> ±0.04  | 2.64 <sup>b</sup> ±0.08  |
| Ethyl Acetate         | 0.29 <sup>b</sup> ±0.03  | 5.61 <sup>c</sup> ±0.09  | 0.15 <sup>a</sup> ±0.03  |
| Acetic acid           | 7.40 <sup>c</sup> ±0.11  | 1.14 <sup>b</sup> ±0.07  | 0.64 <sup>a</sup> ±0.06  |
| 3-Methylbutanal       | 1.87 <sup>b</sup> ±0.08  | 1.28 <sup>a</sup> ±0.11  | 1.92 <sup>c</sup> ±0.13  |
| 2,3-Pentanedione      | 2.42 <sup>b</sup> ±0.07  | 1.80 <sup>a</sup> ±0.09  | 14.82 <sup>c</sup> ±0.19 |
| Hexanal               | 5.10 <sup>a</sup> ±0.10  | 11.75 <sup>c</sup> ±0.18 | 8.70 <sup>b</sup> ±0.21  |
| Butanoic acid         | 9.06 <sup>c</sup> ±0.12  | 4.79 <sup>b</sup> ±0.15  | 0.18 <sup>a</sup> ±0.06  |
| Furfural              | 3.51 <sup>c</sup> ±0.11  | 0.37 <sup>a</sup> ±0.07  | 0.54 <sup>b</sup> ±0.08  |
| 3-Methylbutanoic acid | 11.61 <sup>a</sup> ±0.24 | 35.31 <sup>b</sup> ±0.69 | 55.16 <sup>c</sup> ±0.87 |
| 1-Hexanol             | 0.88 <sup>c</sup> ±0.09  | 0.38 <sup>a</sup> ±0.05  | 0.67 <sup>b</sup> ±0.07  |
| Heptanal              | 3.13 <sup>c</sup> ±0.10  | 0.98 <sup>b</sup> ±0.06  | 0.73 <sup>a</sup> ±0.08  |
| Ethyl hexanoate       | 2.40 <sup>c</sup> ±0.11  | 0.52 <sup>b</sup> ±0.04  | 0.02 <sup>a</sup> ±0.01  |
| 2,5-Dimethylpyrazine  | 0.74 <sup>c</sup> ±0.06  | 0.01 <sup>a</sup> ±0.01  | 0.52 <sup>b</sup> ±0.06  |
| 2,3-Dimethylpyrazine  | 0.82 <sup>a</sup> ±0.07  | 0.91 <sup>b</sup> ±0.09  | 0.82 <sup>a</sup> ±0.07  |
| 2,4-Heptadienal       | 0.50 <sup>b</sup> ±0.04  | 1.25 <sup>c</sup> ±0.12  | 0.39 <sup>a</sup> ±0.05  |
| Benzaldehyde          | 3.05 <sup>c</sup> ±0.09  | 0.24 <sup>a</sup> ±0.08  | 0.35 <sup>b</sup> ±0.04  |
| Hexanoic acid         | 0.19 <sup>b</sup> ±0.09  | 0.44 <sup>c</sup> ±0.09  | 0.07 <sup>a</sup> ±0.02  |
| Trimethylpyrazine     | 0.09 <sup>b</sup> ±0.02  | 0.03 <sup>a</sup> ±0.02  | 0.69 <sup>c</sup> ±0.03  |
| Tetramethylpyrazine   | 0.09 <sup>a</sup> ±0.03  | 0.84 <sup>c</sup> ±0.10  | 0.82 <sup>b</sup> ±0.06  |
| 2-Phenylethanol       | 1.53 <sup>c</sup> ±0.10  | 0.16 <sup>b</sup> ±0.08  | 0.08 <sup>c</sup> ±0.02  |
| Phenylethyl acetate   | 0.01 <sup>a</sup> ±0.01  | 0.01 <sup>a</sup> ±0.01  | 0.01 <sup>a</sup> ±0.01  |
| Maltol                | 0.26 <sup>c</sup> ±0.04  | 0.07 <sup>b</sup> ±0.01  | 0.02 <sup>a</sup> ±0.01  |
| gamma-Nonalactone     | 0.66 <sup>c</sup> ±0.07  | 0.51 <sup>b</sup> ±0.08  | 0.23 <sup>a</sup> ±0.08  |
| Eugenol               | 1.34 <sup>b</sup> ±0.10  | 0.12 <sup>a</sup> ±0.03  | 0.12 <sup>a</sup> ±0.04  |
| delta-Nonalacton      | 0.01 <sup>a</sup> ±0.01  | 0.09 <sup>b</sup> ±0.02  | 0.01 <sup>a</sup> ±0.01  |
| Pentyl octanoate      | 1.95 <sup>b</sup> ±0.12  | 0.01 <sup>a</sup> ±0.01  | 0.01 <sup>a</sup> ±0.01  |
| Myristicin            | 0.65 <sup>c</sup> ±0.06  | 0.20 <sup>b</sup> ±0.13  | 0.01 <sup>a</sup> ±0.01  |
| E-nerolidol           | 0.35 <sup>c</sup> ±0.05  | 0.12 <sup>b</sup> ±0.13  | 0.01 <sup>a</sup> ±0.01  |

\*Values in the same row marked with different letters are statistically significantly different at  $p < 0.05 \pm \text{SD}$ .  
CF - cricket *A. domesticus*, TM - mealworm *T. molitor*, BW - buffalo worm *A. diaperinus*
